# Supplementary material
Source: publisher site journal article supplement (https://www.dovepress.com/get_supplementary_file.php?f=421871.docx)
Supplement: Supplementary file 1 [file get_supplementary_file.php]

# Supplemental material

Supplementary Table 1. Patient survey questionnaire components

| **Survey Component** | **Description** |
| --- | --- |
| Patient screening criteria to confirm eligibility |  |
| Patient demographics | Age, sex, race, geographic region, education, employment, household income, and insurance status |
| Overall health status | Comorbidities and EQ-5D-5L |
| Disease characteristics | Time since AML diagnosis, *FLT3* mutation status, AML treatment history, and monthly out-of-pocket cost of AML treatment among US patients |
| Experience of blood transfusion and hospitalization in the past 3 months | Frequency of blood transfusion, QoL impairment due to blood transfusion, monthly OOP cost of blood transfusion among US patients, and work productivity and activity impairment associated with blood transfusion measured by WPAI questionnaire |
| DCE choice tasks | To assess AML treatment preferences |

**Abbreviations:** AML, acute myeloid leukemia; DCE, discrete choice experiment; *FLT3*, FMS-like tyrosine kinase 3; OOP, out-of-pocket; QoL, quality of life; US, United States; WPAI, Work Productivity and Activity Impairment.

Supplementary Table 2. Physician characteristics

|  | **N=145** |
| --- | --- |
| **Age (years)** |  |
| Mean ± SD | 50.1 ± 8.3 |
| Median (range) | 49.0 (31.0 , 73.0) |
| **Gender, n (%)** |  |
| Female | 32 (22.1%) |
| Male | 110 (75.9%) |
| Do not wish to disclose | 3 (2.1%) |
| **Country of practice, n (%)** |  |
| Australia | 16 (11.0%) |
| Canada | 29 (20.0%) |
| United Kingdom | 52 (35.9%) |
| US | 48 (33.1%) |
| Northeast | 13 (27.1%) |
| Midwest | 5 (10.4%) |
| South | 21 (43.8%) |
| West | 9 (18.8%) |
| **Medical specialtya, n (%)** |  |
| Hematology | 118 (81.4%) |
| Oncology | 58 (40.0%) |
| **Number of AML patients treated in a typical year** |  |
| Mean ± SD | 47.7 ± 88.9 |
| Median (range) | 30 (5, 1,000) |
| **Number of AML patients with *FLT3* mutation treated in a typical year** |  |
| Mean ± SD | 13.9 ± 16.2 |
| Median (range) | 8 (1, 100) |
| **Years practicing medicine** |  |
| Mean ± SD | 19.8 ± 7.4 |
| Median (range) | 20 (4, 40) |
| **Practice settingb, n (%)** | ***N = 93*** |
| Academic institution | 48 (51.6%) |
| Private practice | 21 (22.6%) |
| Public or government institution | 10 (10.8%) |
| Nonacademic hospital or health system | 14 (15.1%) |

aRespondents were able to choose both hematology and oncology.

bOnly physicians in the United States, Canada, and Australia were asked to answer about their practice setting.

**Abbreviations:** AML, acute myeloid leukemia; *FLT3*, FMS-like tyrosine kinase 3; US, United States.
